# Supplementary material
Source: publisher figshare collection journal article supplement (https://frontiersin.figshare.com/ndownloader/files/37624064)

## Additional file 1. The SEIAR model for HFMD

### SEIAR model hypotheses

The SEIAR model was constructed to fit the data. Based on the following hypotheses:

(1) Natural population movements (births, deaths) in each province cause a change in the population base. The birth rate is expressed in  $br$  and the death rate in  $dr$ .

(2) Susceptible ( $S$ ) to contact with Infectious ( $I$ ) conditions, Infectious have a certain degree of infectivity, and transmission rate coefficient is  $\beta$ . If Susceptible is exposed to Asymptomatic ( $A$ ), the Asymptomatic is also contagious,  $k$  times more than the Infectious ( $0 < k < 1$ ), with transmission rate coefficient of  $k\beta$ . The rate of transmission from Susceptible to Exposure ( $E$ ) at moment  $t$  is  $\beta S(I+kA)$ .

(3) After an incubation period of disease, a certain proportion of  $E$  turns into  $I$ . This proportion is  $p$ . The rate of progression from  $E$  to  $I$  at moment  $t$  is proportional to the population of incubation period, with a scale factor of  $p\omega$ . The other part  $(1-p)$  of  $E$  turns into  $A$  after an incubation period of the disease. The rate of progression from  $E$  to  $A$  is proportional to the latency population, with a scale factor of  $(1-p)\omega$ .

(4) Assume that the time interval between the onset of symptoms and recovery of health for  $I$  is  $1/\gamma$ . Then the number of people who change from  $I$  to Recovery ( $R$ ) at moment  $t$  is  $\gamma I$ . Let the rate of death from HFMD be  $f$ , then the number of cases that die at time  $t$  is  $fI$ .

(5) Assume that the time interval between onset and recovery of health for  $A$  is  $1/\gamma'$ . Then the number of people who change from  $A$  to  $R$  at moment  $t$  is  $\gamma'A$ .

The natural history of the disease in HFMD is as follows:

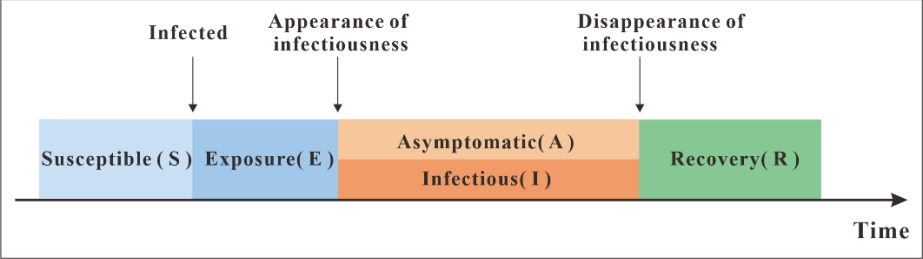

Supplement: Supplementary file [file 37624064]
